# Supplementary material for: In Vitro Continuous Fermentation Model (PolyFermS) of the Swine Proximal Colon for Simultaneous Testing on the Same Gut Microbiota
Source: PubMed Central journal article supplement (PMC3978012; doi:10.1371/journal.pone.0094123), 2014-04-07
Supplement: pone.0094123.s004.pdf [file pone.0094123.s004.pdf]

**Table S1. Composition of the nutritive medium simulating the swine ileal chyme.**

| <b>Ingredients</b>                                                  | <b>g L<sup>-1</sup></b> |
|---------------------------------------------------------------------|-------------------------|
| <b><i>Carbohydrates</i></b>                                         | <b><i>11.32</i></b>     |
| Corn starch                                                         | 4.32                    |
| Pectin (citrus)                                                     | 2.00                    |
| Xylan (beechwood)                                                   | 2.00                    |
| Arabinogalactan (larch wood)                                        | 2.00                    |
| Guar gum                                                            | 1.00                    |
| <b><i>N-compounds</i></b>                                           | <b><i>13.00</i></b>     |
| Soy Peptone                                                         | 13.00                   |
| Yeast extract                                                       | 4.50                    |
| Mucin (from porcine stomach)                                        | 4.00                    |
| <b><i>Salts/Minerals</i></b>                                        |                         |
| L-cysteine HCl monohydrate                                          | 0.80                    |
| Bile extract porcine                                                | 0.40                    |
| KH <sub>2</sub> PO <sub>4</sub>                                     | 0.50                    |
| NaHCO <sub>3</sub>                                                  | 1.50                    |
| NaCl                                                                | 4.50                    |
| KCl                                                                 | 4.50                    |
| MgSO <sub>4</sub> anhy. (120.37 g mol <sup>-1</sup> )               | 0.64                    |
| CaCl <sub>2</sub> · 2H <sub>2</sub> O (147.02 g mol <sup>-1</sup> ) | 0.15                    |
| MnCl <sub>2</sub> · 4H <sub>2</sub> O (197.91 g mol <sup>-1</sup> ) | 0.20                    |
| Hemin solution (0.05 g mL <sup>-1</sup> )                           | 0.05                    |
| Tween 80                                                            | 1.00                    |
