# Supplementary material for: In Vitro Continuous Fermentation Model (PolyFermS) of the Swine Proximal Colon for Simultaneous Testing on the Same Gut Microbiota
Source: PubMed Central journal article supplement (PMC3978012; doi:10.1371/journal.pone.0094123), 2014-04-07
Supplement: pone.0094123.s005.pdf [file pone.0094123.s005.pdf]

**Table S2. 16S rRNA gene copy numbers ( $\log_{10}$  mL<sup>-1</sup> of effluent) of specific bacterial groups measured by qPCR in effluent samples from CR and TR1-4.**

|                        |            | <i>Bifidobacterium</i><br>spp. | <i>Bacteroides-<br/>Prevotella</i><br>group | <i>Enterobacteriaceae</i> | <i>Lactobacillus/<br/>Pediococcus/<br/>Leuconostoc</i><br>spp. | <i>Clostridium</i><br>Cluster IV |
|------------------------|------------|--------------------------------|---------------------------------------------|---------------------------|----------------------------------------------------------------|----------------------------------|
| <b>Stabilization 1</b> | <b>CR</b>  | 5.4 ± 0.7                      | 10.5 ± 0.1                                  | 9.4 ± 0.2                 | 8.4 ± 0.4                                                      | 9.4 ± 0.3                        |
|                        | <b>TR1</b> | 5.1 ± 0.2                      | 10.3 ± 0.1                                  | 9.5 ± 0.3                 | 8.0 ± 0.2                                                      | 9.4 ± 0.2                        |
|                        | <b>TR2</b> | 4.9 ± 0.3                      | 10.4 ± 0.1                                  | 9.4 ± 0.3                 | 7.8 ± 0.4                                                      | 9.5 ± 0.2                        |
|                        | <b>TR3</b> | 5.6 ± 0.4                      | 10.3 ± 0.2                                  | 9.5 ± 0.4                 | 8.1 ± 0.2                                                      | 9.4 ± 0.3                        |
|                        | <b>TR4</b> | 4.8 ± 0.4                      | 10.2 ± 0.3                                  | 9.5 ± 0.2                 | 8.1 ± 0.3                                                      | 9.3 ± 0.1                        |
| <b>Stabilization 2</b> | <b>CR</b>  | 5.9 ± 0.3                      | 10.4 ± 0.1                                  | 9.6 ± 0.03                | 8.0 ± 0.2                                                      | 10.0 ± 0.1                       |
|                        | <b>TR1</b> | 6.0 ± 0.7                      | 10.5 ± 0.2                                  | 9.8 ± 0.1                 | 7.9 ± 0.5                                                      | 9.9 ± 0.1                        |
|                        | <b>TR2</b> | 6.0 ± 0.6                      | 10.5 ± 0.1                                  | 9.8 ± 0.04                | 8.4 ± 0.6                                                      | 10.0 ± 0.2                       |
|                        | <b>TR3</b> | 5.8 ± 0.8                      | 10.4 ± 0.1                                  | 9.6 ± 0.1                 | 7.6 ± 0.7                                                      | 9.8 ± 0.1                        |
|                        | <b>TR4</b> | 6.0 ± 0.6                      | 10.4 ± 0.2                                  | 9.8 ± 0.1                 | 7.8 ± 0.6                                                      | 9.9 ± 0.2                        |
| <b>Stabilization 3</b> | <b>CR</b>  | 6.1 ± 0.1                      | 10.3 ± 0.1                                  | 9.7 ± 0.1                 | 8.3 ± 0.1                                                      | 10.1 ± 0.1                       |
|                        | <b>TR1</b> | 5.8 ± 0.4                      | 10.5 ± 0.1                                  | 9.5 ± 0.04                | 8.7 ± 0.3                                                      | 9.9 ± 0.3                        |
|                        | <b>TR2</b> | 6.0 ± 0.4                      | 10.5 ± 0.2                                  | 9.9 ± 0.1                 | 8.8 ± 0.5                                                      | 9.9 ± 0.2                        |
|                        | <b>TR3</b> | 5.8 ± 0.2                      | 10.4 ± 0.1                                  | 9.7 ± 0.1                 | 8.3 ± 0.6                                                      | 9.8 ± 0.2                        |
|                        | <b>TR4</b> | 5.9 ± 0.3                      | 10.3 ± 0.1                                  | 9.8 ± 0.1                 | 8.7 ± 0.6                                                      | 9.8 ± 0.1                        |
| <b>Stabilization 4</b> | <b>CR</b>  | 6.6 ± 0.1                      | 9.9 ± 0.1                                   | 9.9 ± 0.03                | 7.7 ± 0.3                                                      | 10.0 ± 0.1                       |
|                        | <b>TR1</b> | 7.3 ± 0.1                      | 10.0 ± 0.2                                  | 9.8 ± 0.1                 | 8.4 ± 0.2                                                      | 10.1 ± 0.1                       |
|                        | <b>TR2</b> | 6.4 ± 0.1                      | 9.9 ± 0.1                                   | 9.9 ± 0.3                 | 7.8 ± 0.1                                                      | 10.1 ± 0.1                       |
|                        | <b>TR3</b> | 6.5 ± 0.04                     | 10.0 ± 0.1                                  | 10.1 ± 0.2                | 8.2 ± 0.3                                                      | 10.2 ± 0.2                       |
|                        | <b>TR4</b> | 6.3 ± 0.1                      | 10.0 ± 0.1                                  | 9.9 ± 0.2                 | 8.0 ± 0.4                                                      | 10.2 ± 0.1                       |
| <b>Stabilization 5</b> | <b>CR</b>  | 6.7 ± 0.2                      | 10.0 ± 0.2                                  | 9.9 ± 0.02                | 8.4 ± 0.2                                                      | 9.8 ± 0.3                        |
|                        | <b>TR1</b> | 7.7 ± 0.6                      | 10.1 ± 0.1                                  | 9.8 ± 0.1                 | 8.7 ± 0.4                                                      | 9.6 ± 0.1                        |
|                        | <b>TR2</b> | 6.3 ± 0.7                      | 10.0 ± 0.1                                  | 9.9 ± 0.2                 | 8.6 ± 0.5                                                      | 9.7 ± 0.3                        |
|                        | <b>TR3</b> | 6.5 ± 0.6                      | 10.0 ± 0.1                                  | 9.9 ± 0.1                 | 8.8 ± 0.5                                                      | 9.7 ± 0.2                        |
|                        | <b>TR4</b> | 6.6 ± 0.6                      | 10.1 ± 0.1                                  | 10.0 ± 0.1                | 8.7 ± 0.5                                                      | 9.9 ± 0.3                        |

Data are  $\log_{10}$  transformed and mean values for the last three days of each stabilization period. No

significant differences were observed for all time points tested using the Mann-Whitney U test ( $P < 0.05$ )
